# Supplementary material
Source: PubMed Central journal article supplement (PMC7948286)
Supplement: advancesADV2020002982-suppl1.pdf [file advancesADV2020002982-suppl1.pdf]

**Supplementary Figure 1.** Time-to-progression in patients treated with R-CEOP according to anthracycline exposure; partial anthracycline versus no anthracycline.

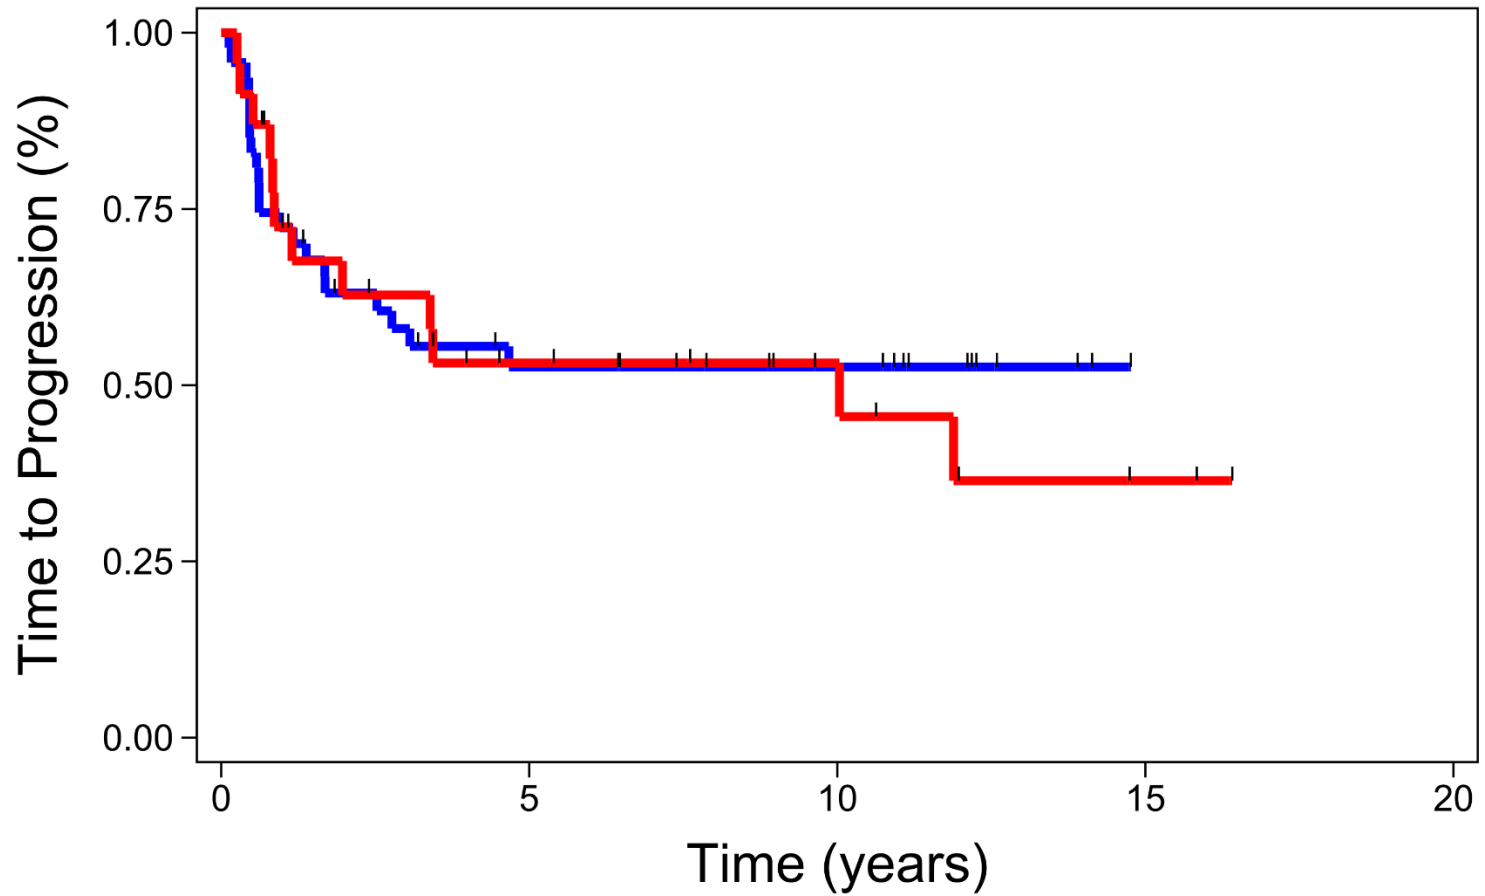

| Number at risk        |    | 0  | 5  | 10 | 15 | 20 |
|-----------------------|----|----|----|----|----|----|
| No Anthracycline      | 47 | 18 | 11 | 0  | 0  | 0  |
| Partial Anthracycline | 23 | 9  | 7  | 2  | 0  | 0  |
